# Supplementary material for: Self-assembly of 1-triacontanol onto layered doubled hydroxide nano-carriers toward sustainable growth regulation of maize
Source: Royal Society of Chemistry journal article supplement (doi:10.1039/d1en00972a), 2022-01-01
Supplement: d1en00972a1.pdf [file d1en00972a1.pdf]

## Electronic Supplementary Information for

### Self-assembly of 1-triacontanol onto Layered Doubled Hydroxide Nano-carrier toward Sustainable Growth Regulation of Maize

Chong Wang,<sup>‡a</sup> Fei Gao,<sup>‡a</sup> Changjiao Sun,<sup>a</sup> Yue Shen,<sup>a</sup> Shenshan Zhan,<sup>a</sup> Xingye Li,<sup>a</sup> Haixin Cui,<sup>a</sup> Liusheng Duan,<sup>\*b</sup> Ye Wang,<sup>\*c</sup> and Yan Wang<sup>\*a</sup>

<sup>a</sup>*Institute of Environment and Sustainable Development in Agriculture, Chinese Academy of Agricultural Sciences, Beijing, 100081, China.*

<sup>b</sup>*State Key Laboratory of Plant Physiology and Biochemistry, Engineering Research Center of Plant Growth Regulators, Ministry of Education, College of Agronomy and Biotechnology, China Agricultural University, Beijing 100193, China.*

<sup>c</sup>*College of Plant Science and Technology, Beijing University of Agriculture, Beijing 102206, China.*

**‡ Chong Wang and Fei Gao contributed equally to this work**

## **Reagent and characterization**

All the chemicals were analytical reagent grade. Deionized water was used throughout the experimental process. Powder X-ray diffraction patterns of all the samples were operated on a Shimadzu XRD-6000 diffractometer with a scan step of  $10^\circ/\text{min}$  and a scan range from 3 to 70 degree. The FT-IR spectra were recorded on a Nicolet iS50, FT-IR Spectrometer, Thermo Fisher Scientific. The samples were scanned against the KBr background with wavenumbers ranging from 4000 to  $500\text{ cm}^{-1}$ . The morphologies of samples were investigated using a scanning electron microscope, Zeiss SUPRA 55.

## **Preparation of rhodamine 6G tagged tria-LDH fluorescent tracer**

Rhodamine B tagged tria-LDH fluorescent nanosheets were fabricated with the same method as that for LDH nano-carriers with some adjustments. Briefly, solution A was prepared as follows:  $\text{Mg}(\text{NO}_3)_2 \cdot 6\text{H}_2\text{O}$  (0.2 M),  $\text{Al}(\text{NO}_3)_3 \cdot 9\text{H}_2\text{O}$  (0.1 M) were dissolved in deionized water (500 ml); solution B was prepared as follows: sodium dodecyl sulfonate (SDS) (0.002 M) rhodamine B (0.00001 M) and NaOH (0.6 M) were dissolved in deionized water (500 ml). Then the above two solutions were quickly mixed with vigorous stirring of 3000 rpm for 3 min. The product was collected by centrifugation at 6000 rpm for 10 minutes and washed with ethanol and water several times until no fluorescence was observed in the supernatant. After the above operation, the fluorescent tracer was obtained.

## **Measurement of 1-triacontanol**

Tria-LDH (1 mL) was dissolved in HCl (18 M, 1 mL), to remove the LDH nano-carrier. After dissolved absolutely into the solution, dichloromethane (10 mL) was added into the solution to extract triacontanol. Then the sample was set on shaking table with  $28\text{ }^\circ\text{C}$  temperature (THZ-98C, Shanghai, China) for 12 h. The accurate content of triacontanol was measured with GC-MS method on Agilent 7890A (gas chromatography, with DB-5MS column ( $30\text{ m} \times 0.25\text{ mm} \times 0.25\text{ }\mu\text{m}$ ) and 5975C (mass spectrometry).

## Physiological indexes of maize

**Table S1.** The seedling height data of maize samples with different treatments under drought stress.

| Days after treatment (day) | Water (cm)  | LDH (cm)   | Tria-ME (cm) | Tria-LDH (cm) |
|----------------------------|-------------|------------|--------------|---------------|
| 0                          | 27.67±1.34  | 27.98±1.43 | 24.13 ±0.96  | 25.77±1.41    |
| 3                          | 35.78±0.545 | 36.01±0.42 | 35.32±1.75   | 36.00±0.98    |
| 5                          | 35.84±0.72  | 36.23±0.98 | 37.10±0.99   | 37.82±1.29    |
| 10                         | 36.04±1.35  | 36.35±1.82 | 38.26±1.57   | 39.01±1.67    |

**Table S2.** The stem diameter data of maize samples with different treatments under drought stress.

| Days after treatment (day) | Water (mm) | LDH (mm)  | Tria-ME (mm) | Tria-LDH (mm) |
|----------------------------|------------|-----------|--------------|---------------|
| 0                          | 2.78±0.05  | 2.82±0.12 | 2.60±0.12    | 3.08±0.25     |
| 3                          | 3.02±0.21  | 3.01±0.23 | 3.20±0.09    | 3.75±0.22     |
| 5                          | 3.00±0.13  | 2.99±0.18 | 3.16±0.09    | 3.23±0.07     |
| 10                         | 2.13±0.20  | 2.23±0.12 | 2.21±0.35    | 2.86±0.24     |

**Table S3.** The leaf area data of maize samples with different treatments under drought stress.

| Days after treatment (day) | Water (cm <sup>2</sup> ) | LDH (cm <sup>2</sup> ) | Tria-ME (cm <sup>2</sup> ) | Tria-LDH (cm <sup>2</sup> ) |
|----------------------------|--------------------------|------------------------|----------------------------|-----------------------------|
| 0                          | 47.95±4.45               | 48.01±4.54             | 46.40±4.84                 | 57.79±5.96                  |
| 3                          | 67.66±1.37               | 66.21±1.77             | 62.18±3.92                 | 72.05±2.74                  |
| 5                          | 53.48±3.45               | 54.15±3.59             | 60.75±3.66                 | 67.96±3.19                  |
| 10                         | 29.71±2.12               | 28.47±2.09             | 32.18±5.19                 | 38.22±4.80                  |

As the weight of a single seedling is too light to ensure the accuracy, the weight data were the average value of 3 plant in the same treated group measured together.

**Table S4.** The aboveground part dry weight of samples with different treatments under drought stress.

| Days after treatment (day) | Water (g) | LDH (g)   | Tria-ME (g) | Tria-LDH (g) |
|----------------------------|-----------|-----------|-------------|--------------|
| 0                          | 0.11±0.01 | 0.12±0.01 | 0.14±0.02   | 0.13±0.02    |
| 3                          | 0.37±0.05 | 0.37±0.06 | 0.41±0.01   | 0.45±0.04    |
| 5                          | 0.35±0.06 | 0.34±0.06 | 0.37±0.01   | 0.38±0.04    |
| 10                         | 0.25±0.05 | 0.26±0.04 | 0.33±0.03   | 0.36±0.03    |

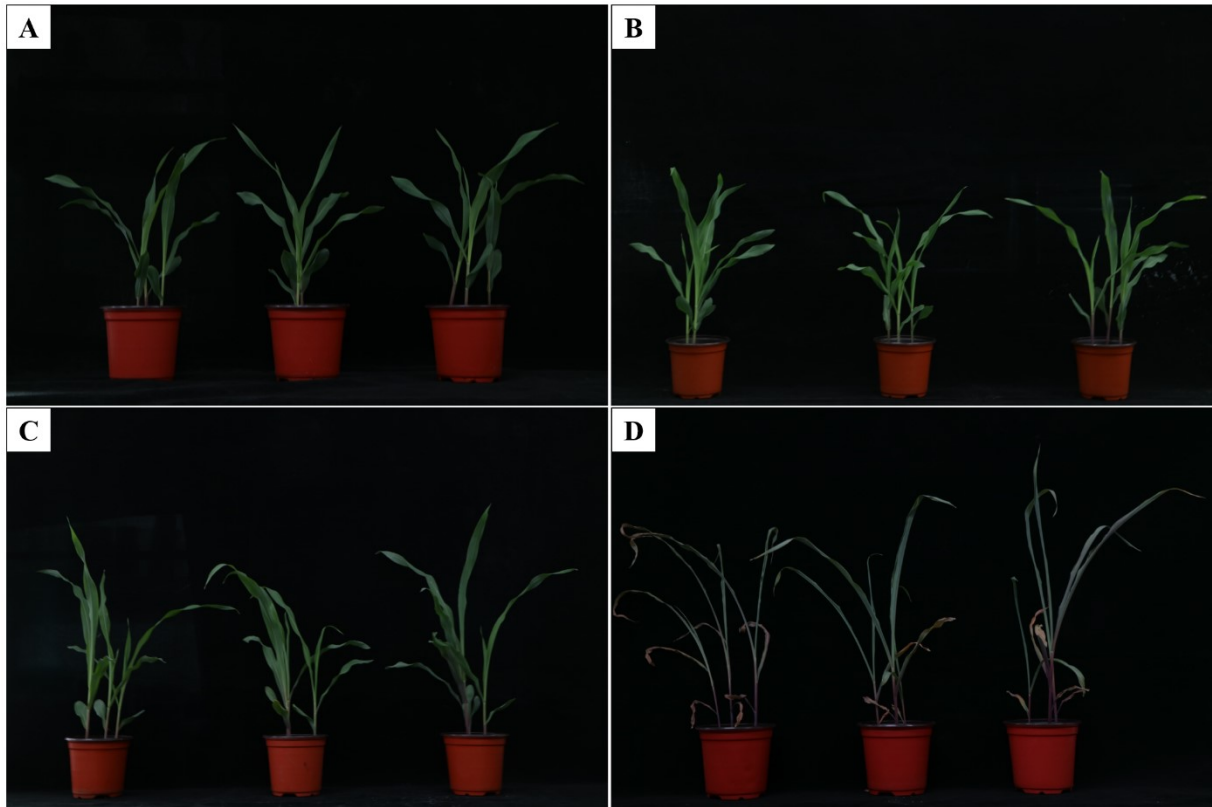

**Figure S1.** The digital pictures of maize seedlings with different treatments during days of drought stress for (A) 0 day. (B) 3 days. (C) 5 days and (D) 10 days. The samples are treated with water, tria-ME and tria-LDH from left to right, respectively.

## Biochemical indexes of maize

**Table S5.** The MDA content data of maize samples with different treatments under drought stress.

| Days after treatment (day) | Water (nmol/g) | LDH (nmol/g) | Tria-ME (nmol/g) | Tria-LDH (nmol/g) |
|----------------------------|----------------|--------------|------------------|-------------------|
| 3                          | 50.95±2.85     | 52.76±0.74   | 29.21±0.95       | 31.43±1.92        |
| 5                          | 72.75±0.50     | 70.14±0.97   | 70.97±0.65       | 41.17±0.95        |
| 10                         | 85.22±1.47     | 85.13±0.46   | 42.64±0.64       | 34.95±1.76        |

**Table S6.** The SOD activity data of maize samples with different treatments under drought stress.

| Days after treatment (day) | Water (U/g)  | LDH (U/g)    | Tria-ME (U/g) | Tria-LDH (U/g) |
|----------------------------|--------------|--------------|---------------|----------------|
| 3                          | 309.75±10.56 | 297.05±11.71 | 271.78±13.45  | 262.27±24.76   |
| 5                          | 427.42± 4.78 | 434.12± 7.69 | 444.52±3.10   | 452.98±3.84    |
| 10                         | 360.96±12.74 | 372.71± 9.86 | 390.14±3.63   | 432.24±14.77   |

**Table S7.** The biochemical index of samples with different treatments under normal circumstance.

| Biochemical index               | Days after treatment (day) | Water (g)    | LDH (g)      | Tria-ME (g)  | Tria-LDH (g) |
|---------------------------------|----------------------------|--------------|--------------|--------------|--------------|
| Seedling height (cm)            | 0                          | 23.45±0.97   | 23.05±0.76   | 22.80±0.51   | 23.30±0.42   |
|                                 | 3                          | 34.53±0.79   | 34.32±0.60   | 35.05±1.32   | 33.95±0.69   |
|                                 | 5                          | 45.98±0.60   | 46.01±0.33   | 46.20±1.09   | 46.98±0.55   |
|                                 | 10                         | 55.78±0.79   | 56.02±0.18   | 56.78±1.23   | 59.15±0.59   |
| Stem diameter (mm)              | 0                          | 2.70±0.09    | 2.66±0.07    | 2.64±0.08    | 2.54±0.04    |
|                                 | 3                          | 3.00±0.06    | 2.99±0.03    | 3.33±0.14    | 3.51±0.27    |
|                                 | 5                          | 3.30±0.14    | 3.30±0.32    | 3.38±0.02    | 3.59±0.02    |
|                                 | 10                         | 3.72±0.08    | 3.71±0.07    | 4.33±0.02    | 4.21±0.14    |
| Leaf area (cm <sup>2</sup> )    | 0                          | 49.28±4.50   | 48.01±5.10   | 49.04±4.84   | 51.79±5.96   |
|                                 | 3                          | 54.22±1.37   | 53.72±1.77   | 58.18±3.92   | 58.21±2.74   |
|                                 | 5                          | 63.35±3.46   | 64.16±3.28   | 69.75±3.66   | 72.96±3.19   |
|                                 | 10                         | 74.71±2.10   | 75.11±2.25   | 79.65±5.19   | 83.22±4.80   |
| Aboveground part dry weight (g) | 0                          | 0.51±0.03    | 0.51±0.03    | 0.50±0.06    | 0.48±0.05    |
|                                 | 3                          | 0.79±0.02    | 0.87±0.05    | 0.79±0.05    | 0.87±0.05    |
|                                 | 5                          | 1.02±0.03    | 1.01±0.02    | 1.17±0.04    | 1.23±0.03    |
|                                 | 10                         | 1.55±0.20    | 1.52±0.06    | 1.98±0.11    | 2.10±0.21    |
| MDA (nmol/g)                    | 3                          | 51.95±2.05   | 51.46±1.00   | 30.10±2.94   | 32.41±1.05   |
|                                 | 5                          | 64.75±1.53   | 65.22±2.45   | 68.65±0.75   | 41.35±0.22   |
|                                 | 10                         | 84.70±2.46   | 84.95±1.46   | 39.95±1.22   | 30.95±1.35   |
| SOD (U/g)                       | 3                          | 308.05±17.16 | 312.68±7.17  | 267.81±21.06 | 258.52±17.62 |
|                                 | 5                          | 423.12±20.17 | 419.55±9.06  | 448.92±14.57 | 454.08±13.59 |
|                                 | 10                         | 364.71±6.94  | 366.12±14.17 | 389.06±9.56  | 430.86±7.17  |
